# Supplementary material
Source: Research Square preprint supplement (doi:10.21203/rs.3.rs-9688431/v1)
Supplement: Supplementary file 1 [file 177a9c64a10b6172e7eb8b97.docx]

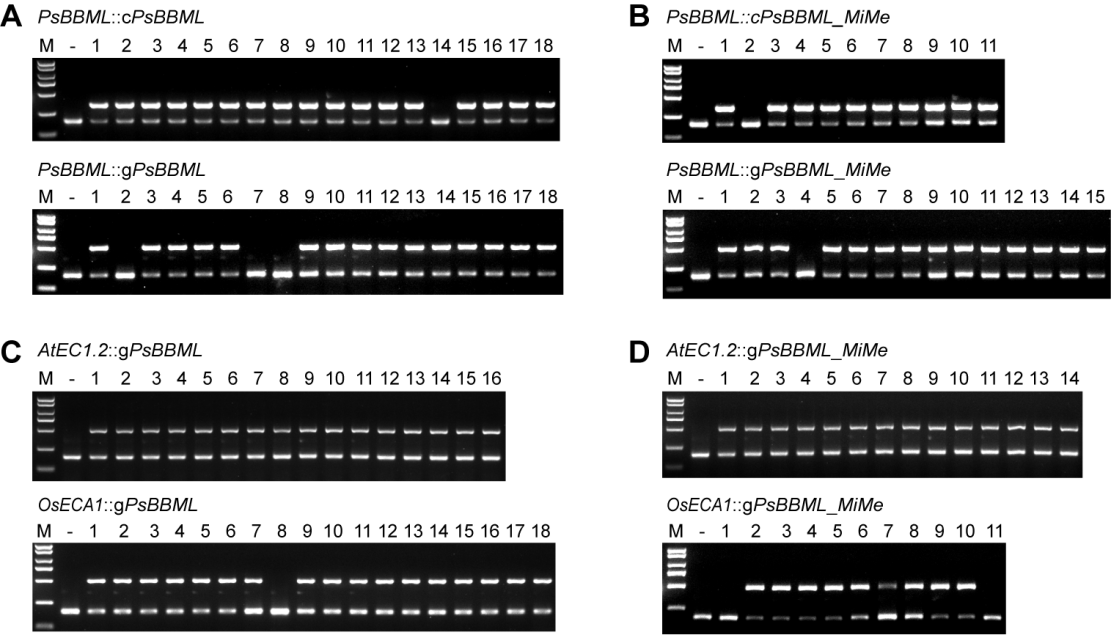


**Supplementary Fig.1|** Validation of transgenic components. (A) *PsBBML::cPsBBML* and *PsBBML::gPsBBML*; (B) *PsBBML::cPsBBML_MiMe* and *PsBBML::gPsBBML_MiMe*; (C) *AtEC1.2::gPsBBML* and *OsECA1::gPsBBML*; (D) *AtEC1.2::gPsBBML_MiMe* and *OsECA1::gPsBBML_MiMe*. For each panel, the upper band represents the PCR amplicon using the primer pair BBML-TF/R, and the lower band represents the amplicon using the internal control primer pair Actin-TF/R. M, 2000 bp DNA marker; -, negative control (non-transgenic sample). Numbers above the lanes indicate independent transgenic lines (e.g., 1-18).


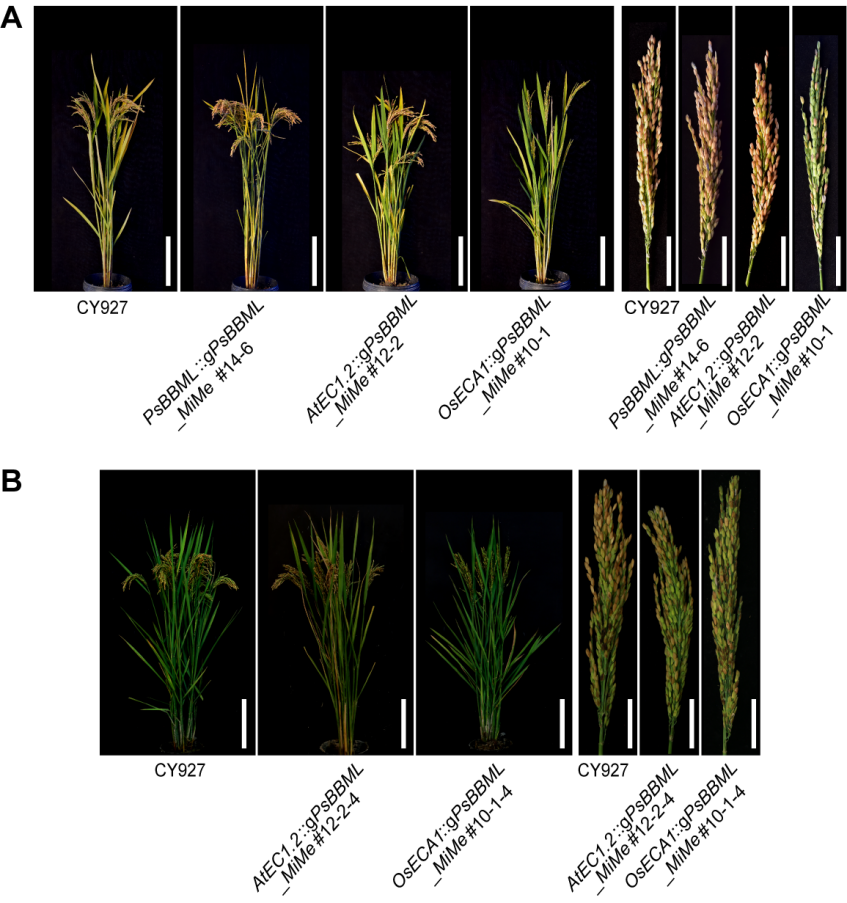


**Supplementary Fig.2**| Phenotypic observation of clonal plants and wild-type CY927. A) T1 clonal plants and wild-type CY927. Scale bars correspond to 16 cm for plants and 4 cm for panicles. B) T2 clonal plants and wild-type CY927. Scale bars correspond to 20 cm for plants and 4 cm for panicles.

**Supplemental Table 1**| Table of seed setting rates in T0 plants.


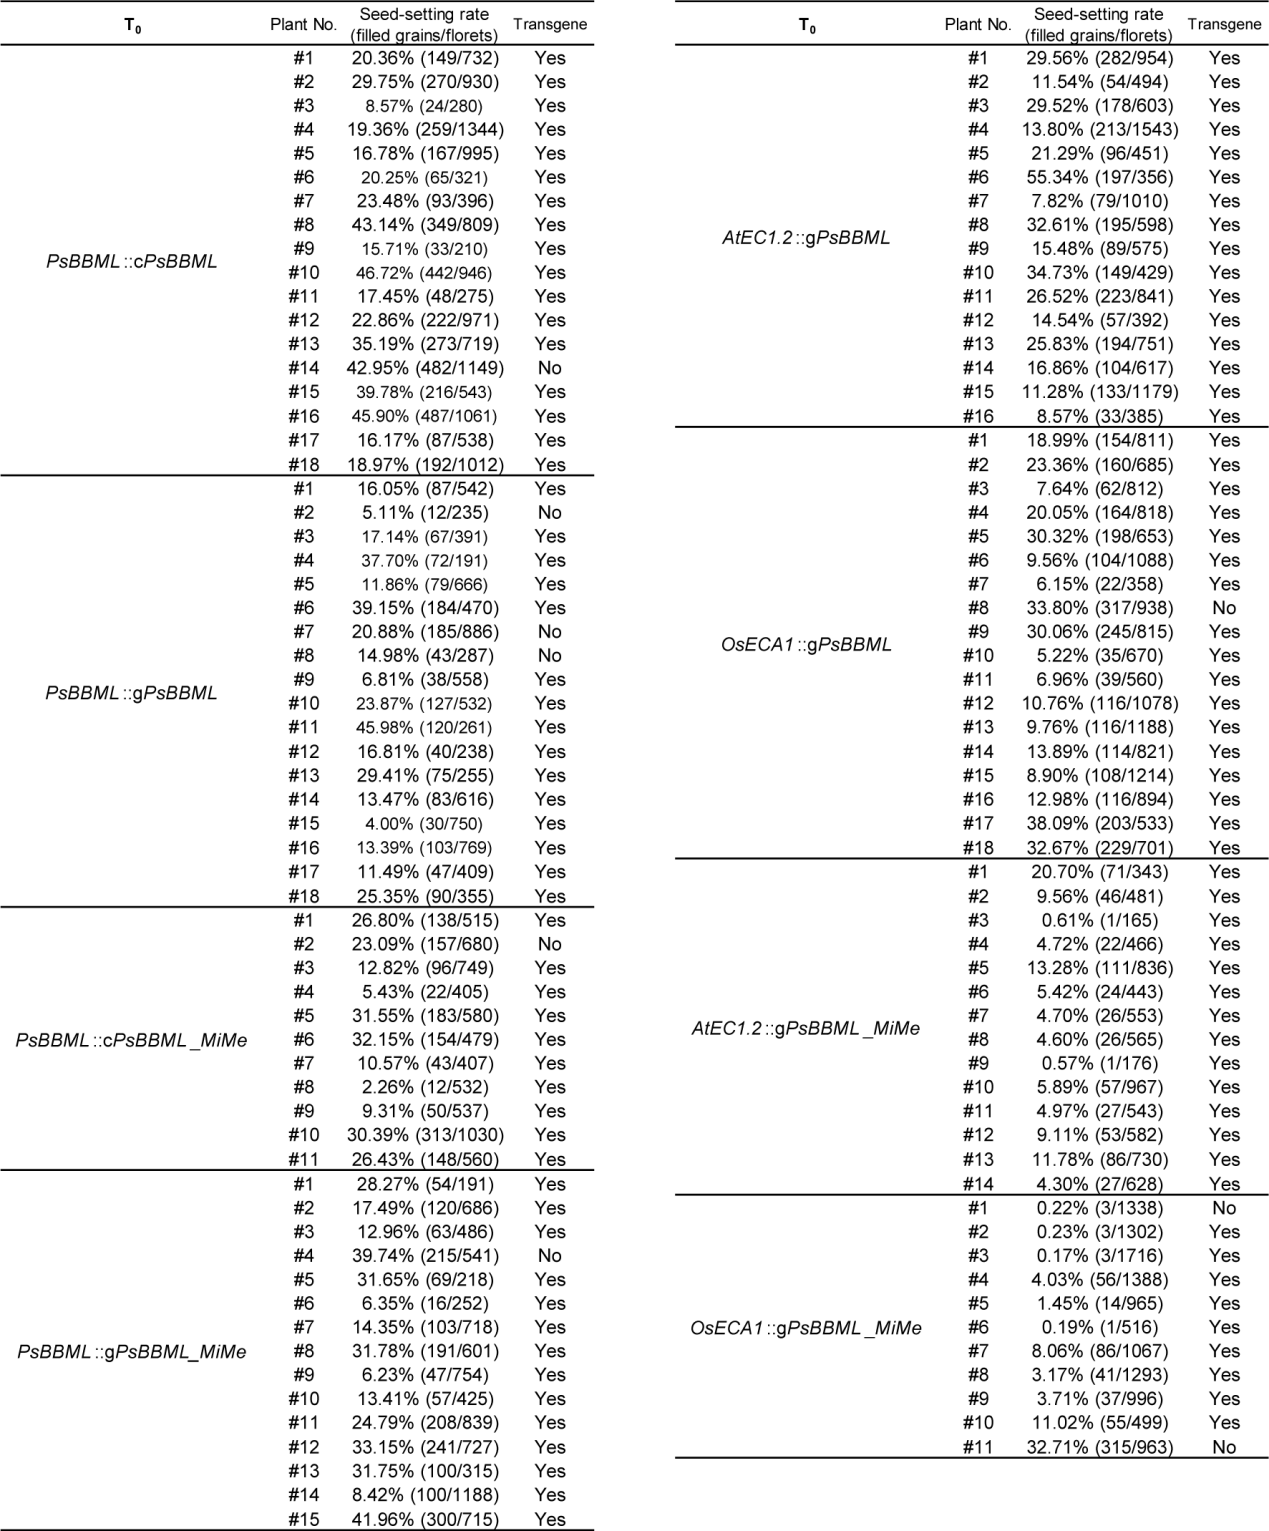


**Supplemental Table 2**| Table of target gene mutation types in T0 plants.


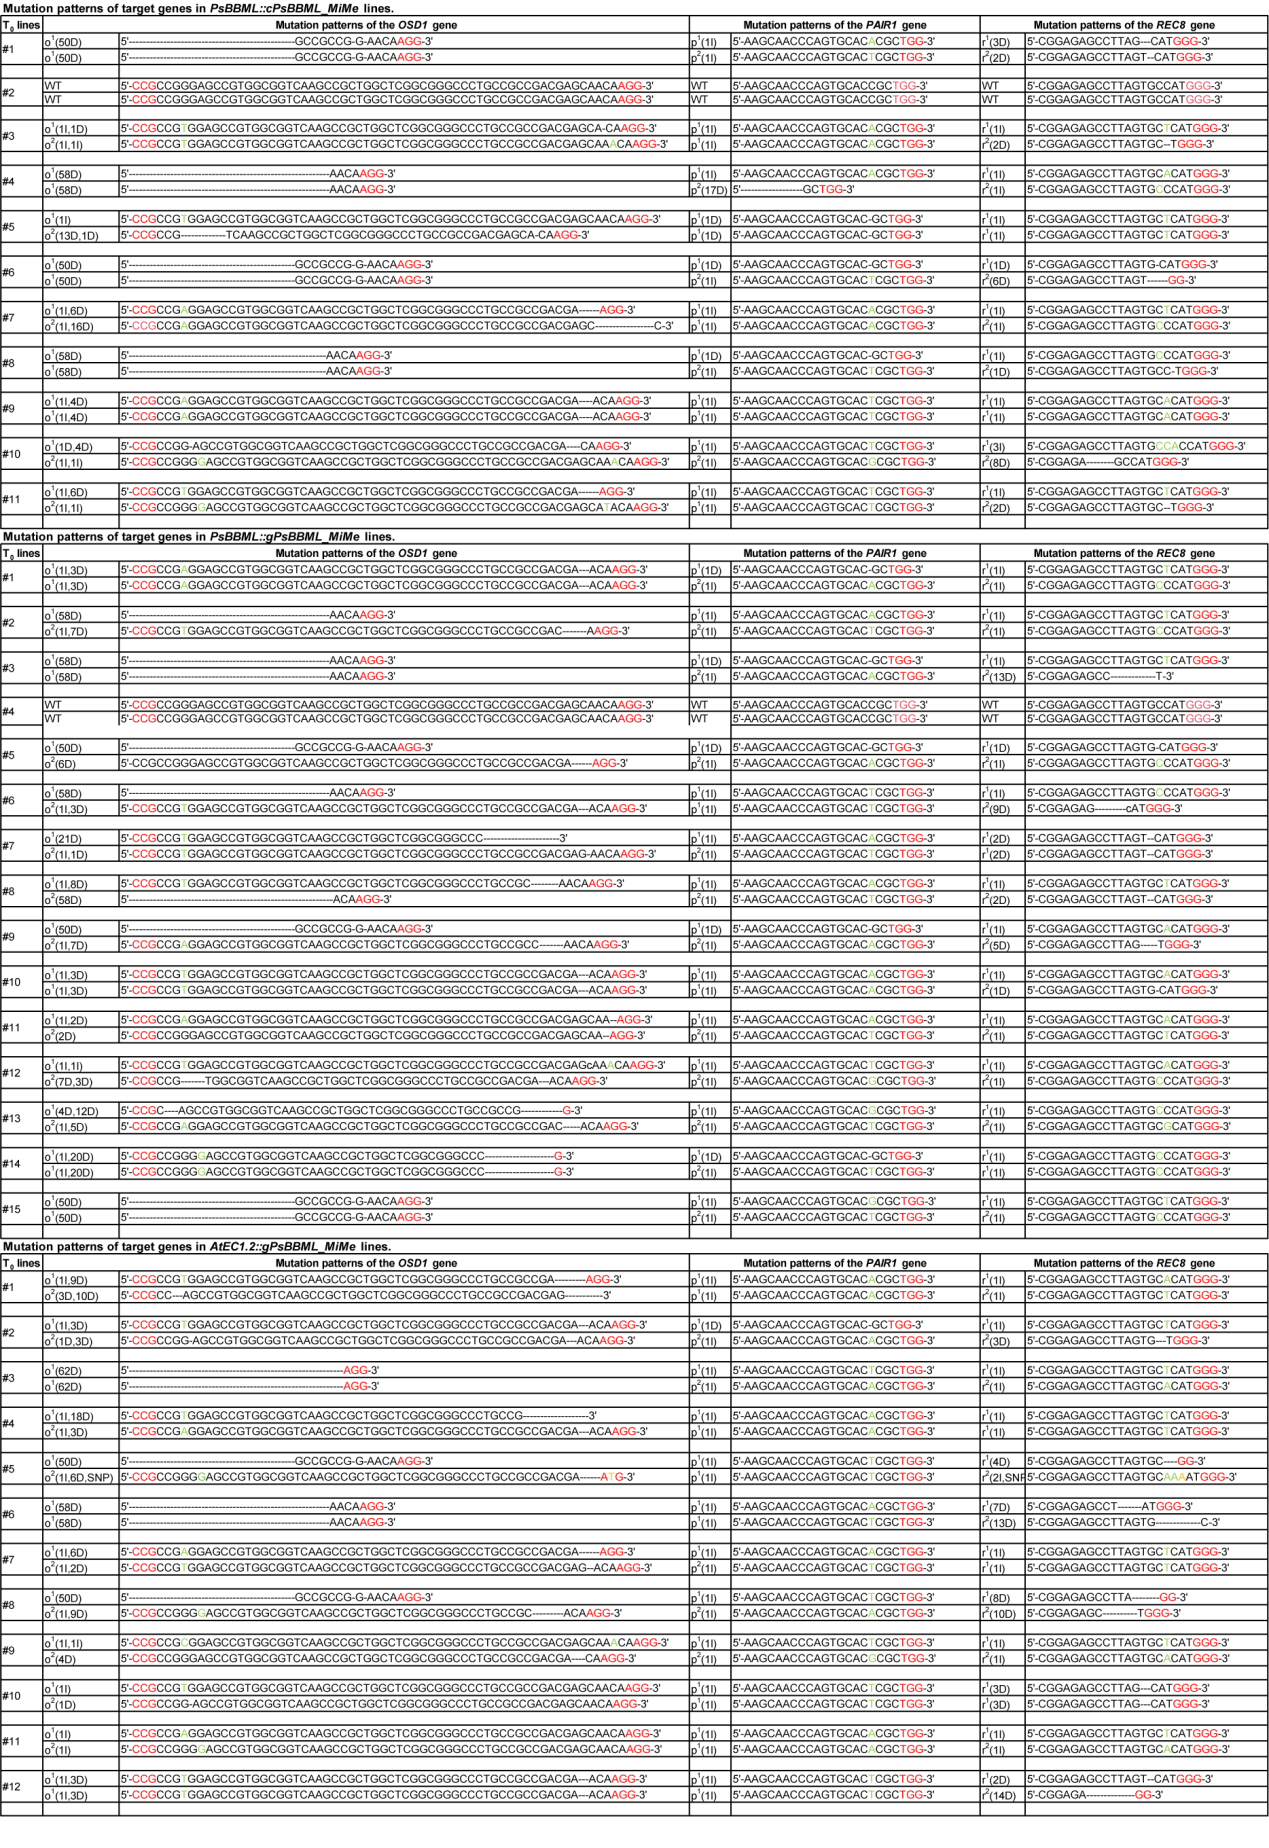


**Supplemental Table 3**| Description of sgRNA target sites and sequences.

| **Target name** | **Target sequences (5’-3’)** |
| --- | --- |
| sgRNA-OSD1-g1 | CTGCCGCCGACGAGCAACAAGG |
| sgRNA-OSD1-g2 | TTGACCGCCACGGCTCCCGGCGG |
| sgRNA-PAIR1 | AAGCAACCCAGTGCACCGCTGG |
| sgRNA-REC8 | CGGAGAGCCTTAGTGCCATGGG |

The PAM motif of target sequence ia shown in red.

**Supplemental Table 4**| The primers were used in this study.

| **Primer name** | **Primer sequences (5’-3’)** | **Remarks** |
| --- | --- | --- |
| PsBBML-PF | ctgtcaaacactgatagtttggatccagccatgtctaaacgatca | fragment amplification primers |
| AtEC1.2-PF | ctgtcaaacactgatagtttaagcatttgcgtttggtttatcattgc | fragment amplification primers |
| OsECA1-PF | ctgtcaaaacactgatagttttatacatgggagtctagtgcaatattactcatgtttttgc | fragment amplification primers |
| NOS-PR | gtcgtttcccggccttcagtttaaacgatctagtaacatagatgac | fragment amplification primers |
| BBML-TF | GGGACACCAACCACTGTAAC | Transgene detection |
| BBML-TR | AGGTGGCAAGCAAGAATAGG | Transgene detection |
| Actin-TF | AGTGTCTGGATTGGAGGATCCATCT | Transgene detection |
| Actin-TR | TTTCCTGTGCACAATGGATGGG | Transgene detection |
| OSD1-HF | GGAGTGAGTACGGTGTGCTATCAGGAGGACGACGTCGCCG | Hi-TOM |
| OSD1-HR | GAGTTGGATGCTGAGTGGCCTCCTCCTCTTGGGTGTAGC | Hi-TOM |
| PAIR1-HF | GGAGTGAGTACGGTGTGCCTTCTTGCGCGCGAAGAAGAGTCTC | Hi-TOM |
| PAIR1-HR | GAGTTGGATGCTGAGTGGGAGATGTAGTGCGTGGGTCTTG | Hi-TOM |
| REC8-HF | GGAGTGAGTACGGTGTGCTTGGGTTAGTGAGGAGAT | Hi-TOM |
| REC8-HR | GAGTTGGATGCTGAGTGGTGCGATCGGAACTATGGAGAC | Hi-TOM |
| Indel 1-2F | TGCTCTAGGCTGGGTTTAGT | Indel marker primer, on chromosomes 1 |
| Indel 1-2R | CTAACACACCGAAGCATCAC | Indel marker primer, on chromosomes 1 |
| Indel 2-1F | CGTGGCCATCTTGTAGTG | Indel marker primer, on chromosomes 2 |
| Indel 2-1R | GCTGCAGTAGACAGAGAT | Indel marker primer, on chromosomes 2 |
| Indel 3-1F | CTTGCCCATCAGCCTATCAC | Indel marker primer, on chromosomes 3 |
| Indel 3-1R | ACACGTACACAGCCATGAGA | Indel marker primer, on chromosomes 3 |
| Indel 4-1F | TGCCTCTTTCGAACGTATCC | Indel marker primer, on chromosomes 4 |
| Indel 4-1R | TAAGCTACGAGCAGTGGACA | Indel marker primer, on chromosomes 4 |
| Indel 5-1F | ACAGCGATAATAACACGCACAA | Indel marker primer, on chromosomes 5 |
| Indel 5-1R | TCAAGTGCTATACTTGACACGG | Indel marker primer, on chromosomes 5 |
| Indel 6-1F | CCATAAGATGCAGGCCGTTGT | Indel marker primer, on chromosomes 6 |
| Indel 6-1R | CAGCTTTGGTCAGATGGTCAC | Indel marker primer, on chromosomes 6 |
| Indel 7-1F | GATTTATAGTTTGAGTGTTTGC | Indel marker primer, on chromosomes 7 |
| Indel 7-1R | CTTGGTTAGTTTCTACCCTGCT | Indel marker primer, on chromosomes 7 |
| Indel 8-3F | AGGTCTTCTGTCCAAGTTCA | Indel marker primer, on chromosomes 8 |
| Indel 8-3R | AACCATATAAACTCATCTGC | Indel marker primer, on chromosomes 8 |
| Indel 9-1F | ATTCTTGTGAGGACGGGAGG | Indel marker primer, on chromosomes 9 |
| Indel 9-1R | GAGAGGCGGTTACCATCTGC | Indel marker primer, on chromosomes 9 |
| Indel 10-1F | GCGCATCCATGCATATCCAA | Indel marker primer, on chromosomes 10 |
| Indel 10-1R | GACAAGGTGTTGCCCAAGAA | Indel marker primer, on chromosomes 10 |
| Indel 11-1F | GGCATCATTAAGGCTTGT | Indel marker primer, on chromosomes 11 |
| Indel 11-1R | CTGGCGATCTCTGTGAGG | Indel marker primer, on chromosomes 11 |
| Indel 12-1F | GAGCAGATCACCCCTAAATTATG | Indel marker primer, on chromosomes 12 |
| Indel 12-1R | GATTCATTCATCTTTCGAAGAG | Indel marker primer, on chromosomes 12 |
